# Supplementary material for: Association between vitamin D supplementation and COVID-19 infection and mortality
Source: Sci Rep. 2022 Nov 12;12:19397. doi: 10.1038/s41598-022-24053-4 (PMC9653496; doi:10.1038/s41598-022-24053-4)
Supplement: Supplementary file 1 — Supplementary Information. [file 41598_2022_24053_MOESM1_ESM.docx]

**Supplementary Appendix**

**Figure S1. Evaluation of Common Support for Treated and Control Patients by Centile of Propensity Score – Vitamin D2**


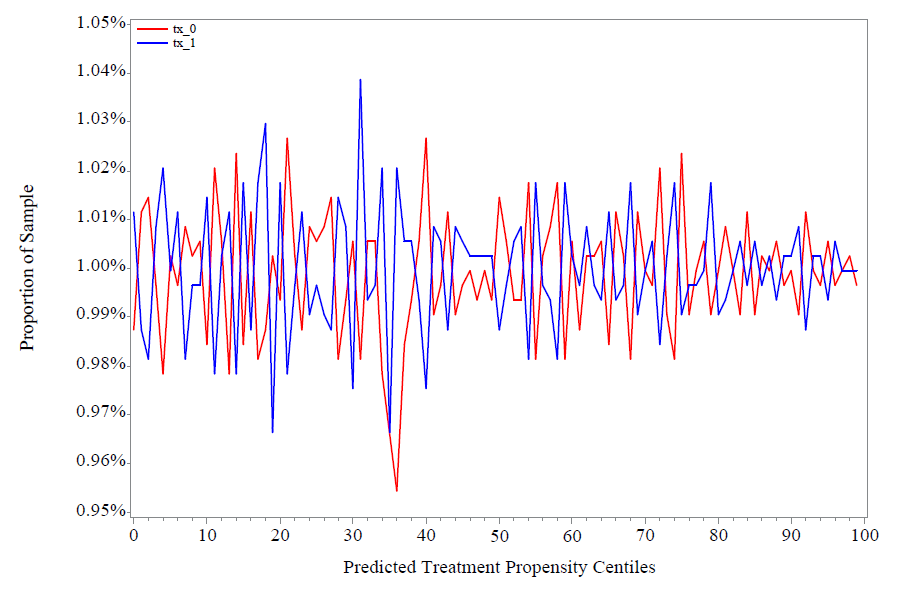


**Notes**: tx_1 represents Vitamin D3 treated patients between January 1, 2019 and December 31, 2020. Tx_0 represents untreated controls over the same period. Common Support was evaluated to ensure strong matches were obtained following 1-1 patient propensity score matching on predicted Vitamin D3 treatment probabilities.

**Sources**: VA EHR and Medicare Claims Data.

**Figure S2. Evaluation of Common Support for Treated and Control Patients by Centile of Propensity Score – Vitamin D3**


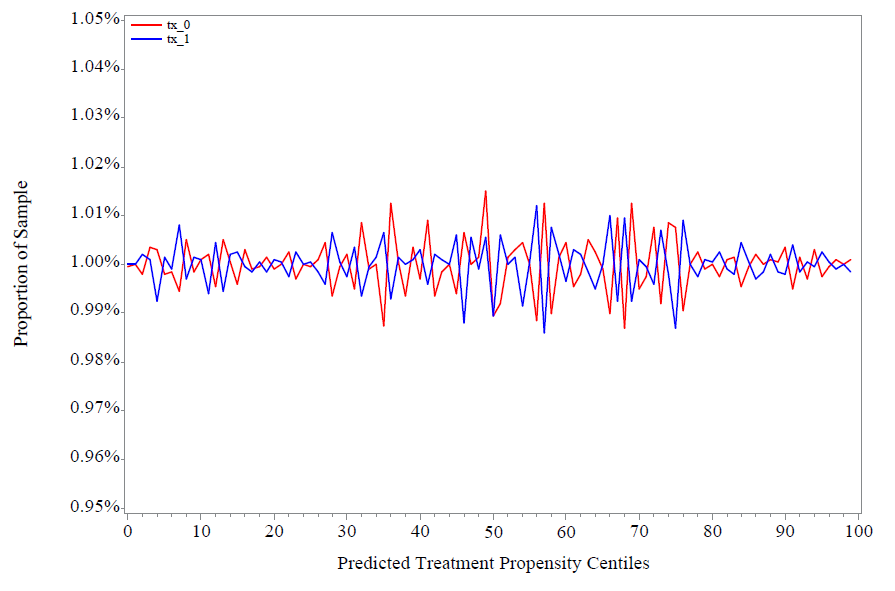


**Notes**: tx_1 represents Vitamin D3 treated patients between January 1, 2019 and December 31, 2020. Tx_0 represents untreated controls over the same period. Common Support was evaluated to ensure strong matches were obtained following 1-1 patient propensity score matching on predicted Vitamin D3 treatment probabilities.

**Sources**: VA HER and Medicare Claims Data.

**Table S1. Evaluation of Balance in Covariates used in the 1-1 Propensity-Score Matching Model After Matching – Vitamin D2**

**
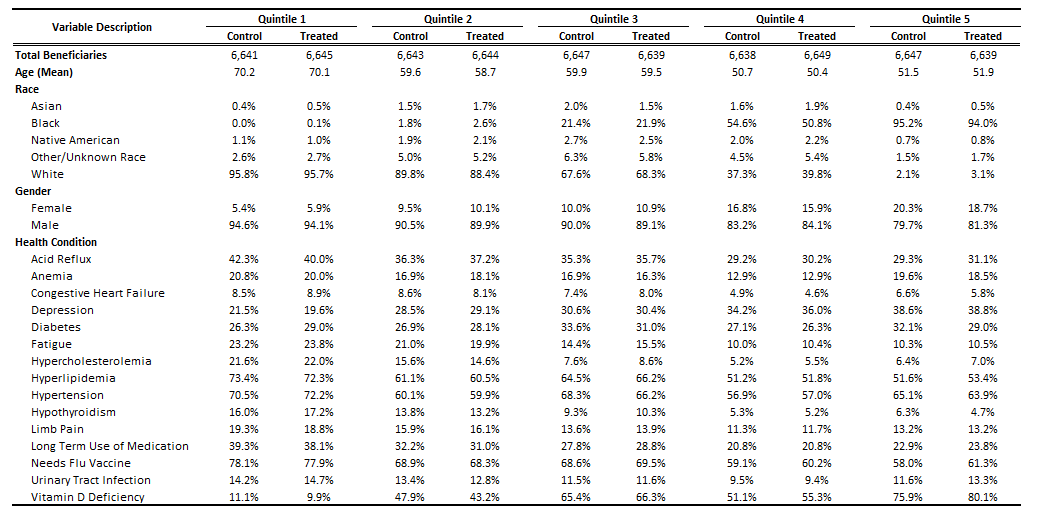
**

| **Notes**: Each cell represents average values of covariates in each quintile of Vitamin D3 treatment propensity among treated and control patients. Covariate balance was evaluated to determine minimal patient characteristic differences following 1-1 propensity score matching on patient Vitamin D3 treatment probabilities.  **Sources**: VA and Medicare Claims Data |
| --- |

**Table S2. Evaluation of Balance in Covariates used in the 1-1 Propensity-Score Matching Model After Matching – Vitamin D3**

**
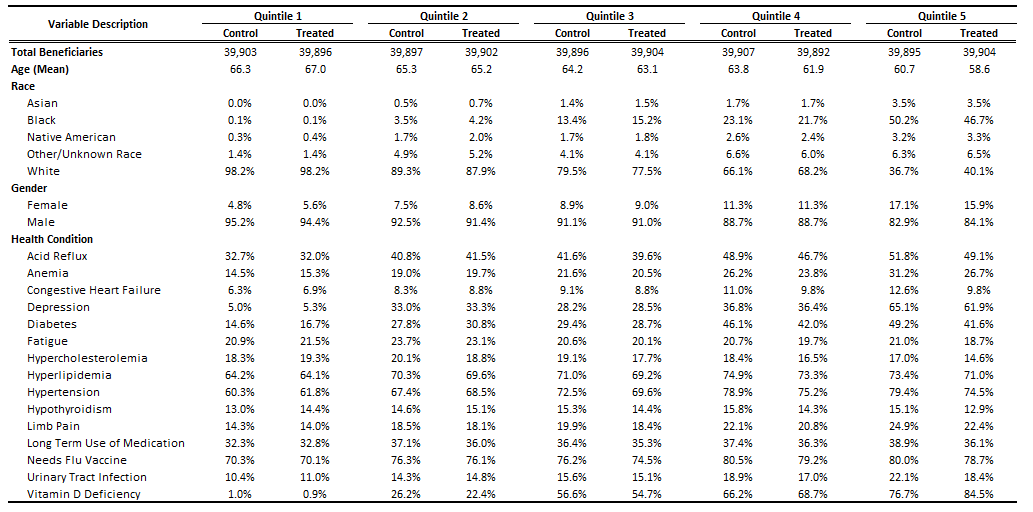
**

| **Notes**: Each cell represents average values of covariates in each quintile of Vitamin D3 treatment propensity among treated and control patients. Covariate balance was evaluated to determine minimal patient characteristic differences following 1-1 propensity score matching on patient Vitamin D3 treatment probabilities.  **Sources**: VA and Medicare Claims Data |
| --- |

**Table S3. Average and Standard Deviations of Vitamin D Average Dosage and Cumulative Dosage Variables**

| **Dosage Type** | **Vitamin D2** | **Vitamin D3** |
| --- | --- | --- |
| **Average Dosage** | | |
| Mean | 49,979 | 2290 |
| Standard Deviation | 985 | 6848 |
| **Cumulative Dosage** | | |
| Mean | 632,210 | 151,330 |
| Standard Deviation | 296,314 | 246,531 |

**Sources**: VA and Medicare Claims Data
